# Supplementary material for: Early Transcriptional Liver Signatures in Experimental Visceral Leishmaniasis
Source: MDPI journal article supplement (doi:10.3390/ijms22137161), 2021-07-02
Supplement: s1 [file s1]

**Table S1. List of TaqMan assays used for RT-qPCR analysis using Quant Studio**

**™ 12K Flex Real-Time PCR System.**

PANEL 1.

| Nº | Assay ID      | GEN      | NOMBRE DEL GEN                                                                           | GRUPO                            |
|----|---------------|----------|------------------------------------------------------------------------------------------|----------------------------------|
| 1  | Mm00437762_m1 | B2m      | beta-2 microglobulin                                                                     | Endogenous gene expression       |
| 2  | Mm00446968_m1 | Hprt     | hypoxanthine guanine phosphoribosyl transferase                                          |                                  |
| 3  | Mm00435617_m1 | Pgk1     | phosphoglycerate kinase 1                                                                |                                  |
| 4  | Mm01277042_m1 | Tbp      | TATA box binding protein                                                                 |                                  |
| 5  | Mm01201237_m1 | Ubc      | ubiquitin C                                                                              |                                  |
| 6  | Mm01722325_m1 | Ywhaz    | tyrosine 3-monooxygenase/tryptophan 5-monooxygenase activation protein, zeta polypeptide |                                  |
| 7  | Mm00599890_m1 | Ifngr1   | interferon gamma receptor 1                                                              | Cytokines and cytokine receptors |
| 8  | Mm00492626_m1 | Ifngr2   | interferon gamma receptor 2                                                              |                                  |
| 9  | Mm01168134_m1 | Ifng     | interferon gamma                                                                         |                                  |
| 10 | Mm01178820_m1 | Tgfb1    | transforming growth factor, beta 1                                                       |                                  |
| 11 | Mm00436955_m1 | Tgfb2    | transforming growth factor, beta 2                                                       |                                  |
| 12 | Mm00436964_m1 | Tgfb1    | transforming growth factor, beta receptor I                                              |                                  |
| 13 | Mm00436977_m1 | Tgfb2    | transforming growth factor, beta receptor II                                             |                                  |
| 14 | Mm00443258_m1 | Tnf      | tumor necrosis factor                                                                    |                                  |
| 15 | Mm00441875_m1 | Tnfrsf1a | tumor necrosis factor receptor superfamily, member 1a                                    |                                  |
| 16 | Mm00441889_m1 | Tnfrsf1b | tumor necrosis factor receptor superfamily, member 1b                                    |                                  |
| 17 | Mm01288580_m1 | Irf1     | interferon regulatory factor 1                                                           |                                  |
| 18 | Mm004967_m1   | Irf5     | interferon regulatory factor 5                                                           |                                  |
| 19 | Mm00516788_m1 | Irf7     | interferon regulatory factor 7                                                           |                                  |
| 20 | Mm01224532_m1 | Irg1     | immunoresponsive gene 1                                                                  |                                  |

|    |               |         |                                     |                                            |
|----|---------------|---------|-------------------------------------|--------------------------------------------|
| 21 | Mm00518984_m1 | Il23a   | interleukin 23, alpha subunit p19   | Interleukines and<br>interleukin receptors |
| 22 | Mm00434237_m1 | Il1r1   | interleukin 1 receptor, type I      |                                            |
| 23 | Mm00439614_m1 | Il10    | interleukin 10                      |                                            |
| 24 | Mm00434157_m1 | Il10rb  | interleukin 10 receptor, beta       |                                            |
| 25 | Mm00434169_m1 | Il12a   | interleukin 12a                     |                                            |
| 26 | Mm00434174_m1 | Il12b   | interleukin 12b                     |                                            |
| 27 | Mm00434189_m1 | Il12rb1 | interleukin 12 receptor, beta 1     |                                            |
| 28 | Mm00434200_m1 | Il12rb2 | interleukin 12 receptor, beta 2     |                                            |
| 29 | Mm00434204_m1 | Il13    | interleukin 13                      |                                            |
| 30 | Mm00439618_m1 | Il17a   | interleukin 17A                     |                                            |
| 31 | Mm00521423_m1 | Il17f   | interleukin 17F                     |                                            |
| 32 | Mm00434214_m1 | Il17ra  | interleukin 17 receptor A           |                                            |
| 33 | Mm00434226_m1 | Il18    | interleukin 18                      |                                            |
| 34 | Mm00456733_m1 | Il18bp  | interleukin 18 binding protein      |                                            |
| 35 | Mm00439620_m1 | Il1a    | interleukin 1 alpha                 |                                            |
| 36 | Mm00434228_m1 | Il1b    | interleukin 1 beta                  |                                            |
| 37 | Mm00446186_m1 | Il1rn   | interleukin 1 receptor antagonist   |                                            |
| 38 | Mm00434256_m1 | Il2     | interleukin 2                       |                                            |
| 39 | Mm00517640_m1 | Il21    | interleukin 21                      |                                            |
| 40 | Mm00600317_m1 | Il21r   | interleukin 21 receptor             |                                            |
| 41 | Mm01192969_m1 | Il22ra2 | interleukin 22 receptor, alpha 2    |                                            |
| 42 | Mm00519943_m1 | Il23r   | interleukin 23 receptor             |                                            |
| 43 | Mm00461162_m1 | Il27    | interleukin 27                      |                                            |
| 44 | Mm00497259_m1 | Il27ra  | interleukin 27 receptor, alpha      |                                            |
| 45 | Mm00442885_m1 | Il2rg   | interleukin 2 receptor, gamma chain |                                            |
| 46 | Mm00445259_m1 | Il4     | interleukin 4                       |                                            |
| 47 | Mm00439646_m1 | Il5     | interleukin 5                       |                                            |
| 48 | Mm00434284_m1 | Il5ra   | interleukin 5 receptor, alpha       |                                            |

|    |               |        |                                                                                   |                                                    |
|----|---------------|--------|-----------------------------------------------------------------------------------|----------------------------------------------------|
| 49 | Mm00446190_m1 | Il6    | interleukin 6                                                                     |                                                    |
| 50 | Mm00439653_m1 | Il6ra  | interleukin 6 receptor, alpha                                                     |                                                    |
| 51 | Mm00439665_m1 | Il6st  | interleukin 6 signal transducer                                                   |                                                    |
| 52 | Mm01290062_m1 | Csf2   | colony stimulating factor 2 (granulocyte-macrophage)                              |                                                    |
| 53 | Mm00655745_m1 | Csf2rb | colony stimulating factor 2 receptor, beta, low-affinity (granulocyte-macrophage) |                                                    |
| 54 | Mm00469294_m1 | Ebi3   | Epstein-Barr virus induced gene 3                                                 |                                                    |
| 55 | Mm00475988_m1 | Arg1   | arginase, liver                                                                   |                                                    |
| 56 | Mm00475162_m1 | Foxp3  | forkhead box P3                                                                   |                                                    |
| 57 | Mm00440338_m1 | Myd88  | myeloid differentiation primary response gene 88                                  | Enzymes,<br>prostaglandins and<br>adaptor proteins |
| 58 | Mm00440502_m1 | Nos2   | nitric oxide synthase 2, inducible                                                |                                                    |
| 59 | Mm00479246_m1 | Nox4   | NADPH oxidase 4                                                                   |                                                    |
| 60 | Mm00478374_m1 | Ptgs2  | prostaglandin-endoperoxide synthase 2                                             |                                                    |
| 61 | Mm00439531_m1 | Stat1  | signal transducer and activator of transcription 1                                |                                                    |
| 62 | Mm01219775_m1 | Stat3  | signal transducer and activator of transcription 3                                |                                                    |
| 63 | Mm00448890_m1 | Stat4  | signal transducer and activator of transcription 4                                |                                                    |
| 64 | Mm01160477_m1 | Stat6  | signal transducer and activator of transcription 6                                |                                                    |
| 65 | Mm00477633_m1 | Bcl6   | B cell leukemia/lymphoma 6                                                        |                                                    |
| 66 | Mm00492590_m1 | Ido1   | indoleamine 2,3-dioxygenase 1                                                     |                                                    |
| 67 | Mm00500554_m1 | Mmp12  | matrix metalloproteinase 12                                                       |                                                    |
| 68 | Mm00485054_m1 | Mmp14  | matrix metalloproteinase 14 (membrane-inserted)                                   |                                                    |
| 69 | Mm00476361_m1 | Nfkb1  | nuclear factor of kappa light polypeptide gene enhancer in B cells 1,<br>p105     |                                                    |
| 70 | Mm00479807_m1 | Nfkb2  | nuclear factor of kappa light polypeptide gene enhancer in B cells 2,<br>p49/p100 |                                                    |
| 71 | Mm00450960_m1 | Tbx21  | T-box 21                                                                          |                                                    |
| 72 | Mm00441891_m1 | Cd40   | CD40 antigen                                                                      |                                                    |
| 73 | Mm00441911_m1 | Cd40lg | CD40 ligand                                                                       |                                                    |

|     |               |        |                                             |                                                 |
|-----|---------------|--------|---------------------------------------------|-------------------------------------------------|
| 74  | Mm00711660_m1 | Cd80   | CD80 antigen                                | Costimulatory and<br>cell adhesion<br>molecules |
| 75  | Mm00444543_m1 | Cd86   | CD86 antigen                                |                                                 |
| 76  | Mm00486849_m1 | Ctla4  | cytotoxic T-lymphocyte-associated protein 4 |                                                 |
| 77  | Mm03048248_m1 | Cd274  | CD274 antigen                               |                                                 |
| 78  | Mm00516023_m1 | Icam1  | intercellular adhesion molecule 1           |                                                 |
| 79  | Mm00494862_m1 | Icam2  | intercellular adhesion molecule 2           |                                                 |
| 80  | Mm00497600_m1 | Icos   | inducible T cell co-stimulator              |                                                 |
| 81  | Mm00497237_m1 | Icosl  | icos ligand                                 |                                                 |
| 82  | Mm00434513_m1 | Itgb2  | integrin beta 2                             |                                                 |
| 83  | Mm00486868_m1 | Cd83   | CD83 antigen                                |                                                 |
| 84  | Mm00493071_m1 | Lag3   | lymphocyte-activation gene 3                |                                                 |
| 85  | Mm01285676_m1 | Pdcd1  | programmed cell death 1                     |                                                 |
| 86  | Mm00454540_m1 | Havcr2 | hepatitis A virus cellular receptor 2       |                                                 |
| 87  | Mm00441242_m1 | Ccl2   | chemokine (C-C motif) ligand 2              | Chemokines and<br>chemokine receptors           |
| 88  | Mm00441258_m1 | Ccl3   | chemokine (C-C motif) ligand 3              |                                                 |
| 89  | Mm00443111_m1 | Ccl4   | chemokine (C-C motif) ligand 4              |                                                 |
| 90  | Mm01302427_m1 | Ccl5   | chemokine (C-C motif) ligand 5              |                                                 |
| 91  | Mm00443113_m1 | Ccl7   | chemokine (C-C motif) ligand 7              |                                                 |
| 92  | Mm01216147_m1 | Ccr1   | chemokine (C-C motif) receptor 1            |                                                 |
| 93  | Mm01216173_m1 | Ccr2   | chemokine (C-C motif) receptor 2            |                                                 |
| 94  | Mm01216171_m1 | Ccr5   | chemokine (C-C motif) receptor 5            |                                                 |
| 95  | Mm01301785_m1 | Ccr7   | chemokine (C-C motif) receptor 7            |                                                 |
| 96  | Mm04207460_m1 | Cxcl1  | chemokine (C-X-C motif) ligand 1            |                                                 |
| 97  | Mm00445235_m1 | Cxcl10 | chemokine (C-X-C motif) ligand 10           |                                                 |
| 98  | Mm00436450_m1 | Cxcl2  | chemokine (C-X-C motif) ligand 2            |                                                 |
| 99  | Mm00434946_m1 | Cxcl9  | chemokine (C-X-C motif) ligand 9            |                                                 |
| 100 | Mm00438258_m1 | Cxcr2  | chemokine (C-X-C motif) receptor 2          |                                                 |
| 101 | Mm00438259_m1 | Cxcr3  | chemokine (C-X-C motif) receptor 3          |                                                 |

|     |               |        |                                    |                     |
|-----|---------------|--------|------------------------------------|---------------------|
| 102 | Mm00434772_m1 | Xcl1   | chemokine (C motif) ligand 1       |                     |
| 103 | Mm00441260_m1 | Ccl9   | chemokine (C-C motif) ligand 9     |                     |
| 104 | Mm00444533_m1 | Cxcl13 | chemokine (C-X-C motif) ligand 13  |                     |
| 105 | Mm00469712_m1 | Cxcl16 | chemokine (C-X-C motif) ligand 16  |                     |
| 106 | Mm01701838_m1 | Cxcl3  | chemokine (C-X-C motif) ligand 3   |                     |
| 107 | Mm00432086_m1 | Cxcr5  | chemokine (C-X-C motif) receptor 5 |                     |
| 108 | Mm00442346_m1 | Tlr2   | toll-like receptor 2               | Toll-like receptors |
| 109 | Mm01207404_m1 | Tlr3   | toll-like receptor 3               |                     |
| 110 | Mm00445273_m1 | Tlr4   | toll-like receptor 4               |                     |
| 111 | Mm00446590_m1 | Tlr7   | toll-like receptor 7               |                     |
| 112 | Mm00446193_m1 | Tlr9   | toll-like receptor 9               |                     |

PANEL 2.

| N° | Assay ID      | GEN             | NOMBRE DEL GEN                                                               | GRUPO                      |
|----|---------------|-----------------|------------------------------------------------------------------------------|----------------------------|
| 1  | Mm00437762_m1 | B2m             | beta-2 microglobulin                                                         | Endogenous gene expression |
| 2  | Mm00446968_m1 | Hprt            | hypoxanthine guanine phosphoribosyl transferase                              |                            |
| 3  | Mm01201237_m1 | Ubc             | ubiquitin C                                                                  |                            |
| 4  | Mm01331626_m1 | Akt1            | thymoma viral proto-oncogene 1                                               | MAPK signaling pathway     |
| 5  | Mm01173094_m1 | Akt2            | thymoma viral proto-oncogene 2                                               |                            |
| 6  | Mm00442194_m1 | Akt3            | thymoma viral proto-oncogene 3                                               |                            |
| 7  | Mm01973540_g1 | Mapk3, Erk1     | mitogen-activated protein kinase 3                                           |                            |
| 8  | Mm00442479_m1 | Mapk1, Erk2     | mitogen-activated protein kinase 1                                           |                            |
| 9  | Mm00489514_m1 | Mapk8, Jnk      | mitogen-activated protein kinase 8                                           |                            |
| 10 | Mm00444968_m1 | Mtor            | mechanistic target of rapamycin (serine/threonine kinase)                    |                            |
| 11 | Mm01301009_m1 | Mapk14, P38mapk | mitogen-activated protein kinase 14                                          |                            |
| 12 | Mm01282781_m1 | Pik3r1, Pi3k    | phosphatidylinositol 3-kinase, regulatory subunit, polypeptide 1 (p85 alpha) |                            |
| 13 | Mm00440940_m1 | Pparg           | peroxisome proliferator activated receptor gamma                             | Lipid metabolism           |
| 14 | Mm00443451_m1 | Nr1h3           | nuclear receptor subfamily 1, group H, member 3                              |                            |
| 15 | Mm00447040_m1 | Pla2g4a         | phospholipase A2, group IVA (cytosolic, calcium-dependent)                   |                            |
| 16 | Mm00447271_m1 | Ptgis           | prostaglandin I2 (prostacyclin) synthase                                     |                            |
| 17 | Mm00441185_m1 | Rxra            | retinoid X receptor alpha                                                    |                            |
| 18 | Mm00436051_m1 | Ptger2, Ep      | prostaglandin E receptor 2 (subtype EP2)                                     | Prostaglandine synthesis   |
| 19 | Mm00436053_m1 | Ptger4          | prostaglandin E receptor 4 (subtype EP4)                                     |                            |
| 20 | Mm00452105_m1 | Ptges           | prostaglandin E synthase                                                     |                            |
| 21 | Mm00460181_m1 | Ptges2          | prostaglandin E synthase 2(Ptges2)                                           |                            |
| 22 | Mm01731378_g1 | Ptges3          | prostaglandin E synthase 3 (cytosolic)                                       |                            |
| 23 | Mm00477214_m1 | Ptgs1           | prostaglandin-endoperoxide synthase 1                                        |                            |

|    |               |               |                                                                     |                                   |
|----|---------------|---------------|---------------------------------------------------------------------|-----------------------------------|
| 24 | Mm01199500_m1 | P2rx7         | purinergic receptor P2X, ligand-gated ion channel, 7                |                                   |
| 25 | Mm00435472_m1 | P2ry2         | purinergic receptor P2Y, G-protein coupled 2                        |                                   |
| 26 | Mm00436055_m1 | Ptgfr         | prostaglandin F receptor                                            |                                   |
| 27 | Mm00479846_m1 | Hpgds, Ptgds2 | intercellular adhesion molecule 1                                   |                                   |
| 28 | Mm00482476_m1 | Ptgr1, Ltb4dh | prostaglandin reductase 1                                           |                                   |
| 29 | Mm00521839_m1 | Ltb4r1, Blt1  | leukotriene B4 receptor 1                                           |                                   |
| 30 | Mm01182747_m1 | Alox5         | arachidonate 5-lipoxygenase                                         |                                   |
| 31 | Mm00507789_m1 | Alox15        | arachidonate 15-lipoxygenase                                        |                                   |
| 32 | Mm00521826_m1 | Lta4h         | leukotriene A4 hydrolase                                            |                                   |
| 33 | Mm00545833_m1 | Alox12        | arachidonate 12-lipoxygenase                                        |                                   |
| 34 | Mm00839636_g1 | Cd68          | CD68 antigen                                                        | Cholesterol pathway               |
| 35 | Mm00432403_m1 | Cd36          | CD36 antigen                                                        |                                   |
| 36 | Mm00459972_m1 | Cd209d        | CD209d antigen                                                      | C-Type Lectin<br>Receptors (CLRs) |
| 37 | Mm01183349_m1 | Clec7a        | C-type lectin domain family 7, member a                             |                                   |
| 38 | Mm01329362_m1 | Mrc1          | mannose receptor, C type 1                                          |                                   |
| 39 | Mm01183378_m1 | Cd69          | CD69 antigen                                                        |                                   |
| 40 | Mm00495182_m1 | Klrd1, Cd94   | killer cell lectin-like receptor, subfamily D, member 1             |                                   |
| 41 | Mm00435587_m1 | Pfkfb1        | phosphofructokinase, liver, B-type                                  | Carbohydrates<br>synthesis        |
| 42 | Mm00439344_m1 | Hk1           | hexokinase 2                                                        |                                   |
| 43 | Mm00443385_m1 | Hk2           | hematopoietic prostaglandin D synthase                              |                                   |
| 44 | Mm00441480_m1 | Slc2a1        | solute carrier family 2 (facilitated glucose transporter), member 1 |                                   |
| 45 | Mm00472712_m1 | Gys1          | granzyme B                                                          |                                   |
| 46 | Mm00504650_m1 | Pfkfb3        | 6-phosphofructo-2-kinase/fructose-2,6-bisphosphatase 3              |                                   |
| 47 | Mm00554300_m1 | Pdk1          | pyruvate dehydrogenase kinase, isoenzyme 1                          |                                   |
| 48 | Mm01268229_m1 | Pgm2          | phosphoglucomutase 2                                                |                                   |
| 49 | Mm01612132_g1 | Ldha          | lactate dehydrogenase A                                             |                                   |
| 50 | Mm00833691_g1 | Tpi1          | triosephosphate isomerase 1                                         |                                   |
| 51 | Mm00434151_m1 | Il10ra        | interleukin 10 receptor, beta                                       |                                   |

|    |               |             |                                                    |                                            |
|----|---------------|-------------|----------------------------------------------------|--------------------------------------------|
| 52 | Mm00446726_m1 | Il13ra1     | interleukin 13 receptor, alpha 2                   | Interleukines and<br>interleukin receptors |
| 53 | Mm00515166_m1 | Il13ra2     | interleukin 15                                     |                                            |
| 54 | Mm00434210_m1 | Il15        | interleukin 16                                     |                                            |
| 55 | Mm00516039_m1 | Il16        | interleukin 17 receptor A                          |                                            |
| 56 | Mm00515178_m1 | Il18r1      | interleukin 18 receptor accessory protein          |                                            |
| 57 | Mm00516053_m1 | Il18rap     | interleukin 1 alpha                                |                                            |
| 58 | Mm00663697_m1 | Il22ra1     | interleukin 23, alpha subunit p19                  |                                            |
| 59 | Mm01340213_m1 | Il27ra      | interleukin 2 receptor, alpha chain                |                                            |
| 60 | Mm00434268_m1 | Il2rb       | interleukin 2 receptor, gamma chain                |                                            |
| 61 | Mm01275139_m1 | Il4ra       | interleukin 5 receptor, alpha                      |                                            |
| 62 | Mm00434295_m1 | Il7r, Cd127 | interleukin 9 receptor                             |                                            |
| 63 | Mm00434313_m1 | Il9r        | interferon regulatory factor 1                     |                                            |
| 64 | Mm00499822_m1 | Il25        | interleukin 25                                     |                                            |
| 65 | Mm00434305_m1 | Il9         | interleukin 9                                      |                                            |
| 66 | Mm00499822_m1 | Il2ra, Cd25 | interleukin 2 receptor, alpha chain                |                                            |
| 67 | Mm00444241_m1 | Il22        | interleukin 22                                     |                                            |
| 68 | Mm00516136_m1 | Ccl17       | chemokine (C-C motif) ligand 17                    | Chemokines and<br>chemokine receptors      |
| 69 | Mm00839966_g1 | Ccl19       | chemokine (C-C motif) ligand 19                    |                                            |
| 70 | Mm00436439_m1 | Ccl22       | chemokine (C-C motif) ligand 22                    |                                            |
| 71 | Mm00438271_m1 | Ccr4        | chemokine (C-C motif) receptor 4                   |                                            |
| 72 | Mm00444662_m1 | Cxcl11      | chemokine (C-X-C motif) ligand 11                  |                                            |
| 73 | Mm01292123_m1 | Cxcr4       | chemokine (C-X-C motif) receptor 4                 |                                            |
| 75 | Mm00472858_m1 | Cxcr6       | Epstein-Barr virus induced gene 3                  |                                            |
| 76 | Mm00441263_m1 | Cxcl15      | chemokine (C-X-C motif) ligand 15                  |                                            |
| 77 | Mm00490880_m1 | Stat2       | signal transducer and activator of transcription 2 | Enzymes and adaptor<br>proteins            |
| 78 | Mm00600614_m1 | Jak1        | Janus kinase 1                                     |                                            |
| 79 | Mm01208489_m1 | Jak2        | Janus kinase 2                                     |                                            |
| 80 | Mm00477631_m1 | Bcl2        | B cell leukemia/lymphoma 2                         |                                            |



|     |               |                |                                                              |                                                 |
|-----|---------------|----------------|--------------------------------------------------------------|-------------------------------------------------|
| 81  | Mm00432050_m1 | Bax            | BCL2-associated X protein                                    |                                                 |
| 82  | Mm00437783_m1 | Bcl2l1         | BCL2-like 1                                                  |                                                 |
| 83  | Mm00438861_m1 | Fadd           | Fas (TNF receptor superfamily member 6)                      |                                                 |
| 84  | Mm00442834_m1 | Gzmb           | hepatitis A virus cellular receptor 2                        |                                                 |
| 85  | Mm00436979_m1 | Tgm2           | transglutaminase 2, C polypeptide                            |                                                 |
| 86  | Mm00445109_m1 | Retnla, Fizz1  | resistin like alpha                                          |                                                 |
| 87  | Mm00448427_m1 | Ptpn1, Ptp1b   | protein tyrosine phosphatase, non-receptor type 1            |                                                 |
| 88  | Mm01278617_m1 | Mki67, Ki67    | antigen identified by monoclonal antibody Ki 67              |                                                 |
| 89  | Mm00661498_m1 | CD57, B3gat1   | beta-1,3-glucuronyltransferase 1 (glucuronosyltransferase P) |                                                 |
| 90  | Mm00451734_m1 | Pdcd1lg2       | programmed cell death 1 ligand 2                             | Costimulatory and<br>cell adhesion<br>molecules |
| 91  | Mm00599683_m1 | Cd3e           | CD3 antigen, epsilon polypeptide                             |                                                 |
| 92  | Mm01182108_m1 | Cd8a           | CD8 antigen, alpha chain                                     |                                                 |
| 93  | Mm00488332_m1 | Siglec1, Cd169 | sialic acid binding Ig-like lectin 1, sialoadhesin           |                                                 |
| 94  | Mm00434455_m1 | Itgam          | integrin alpha M                                             |                                                 |
| 95  | Mm00483137_m1 | Cd28           | CD28 antigen                                                 |                                                 |
| 96  | Mm00801807_m1 | Itgal          | integrin alpha M                                             |                                                 |
| 97  | Mm00444461_m1 | Cd160          | CD160 antigen                                                |                                                 |
| 98  | Mm01251919_m1 | Itgae, Cd103   | integrin alpha L                                             |                                                 |
| 99  | Mm00442754_m1 | Cd4            | CD4 antigen(Cd4)                                             |                                                 |
| 100 | Mm01149710_m1 | Ncam1, Cd56    | neural cell adhesion molecule 1                              |                                                 |
| 101 | Mm00484683_m1 | Gata3          | glycogen synthase 1, muscle                                  | Transcription factors                           |
| 102 | Mm00467257_m1 | Nfat5          | nuclear factor of activated T cells 5                        |                                                 |
| 103 | Mm00468869_m1 | Hif1a          | hexokinase 1                                                 |                                                 |
| 104 | Mm00627599_m1 | Ucp2           | uncoupling protein 2 (mitochondrial, proton carrier)         | Carrier proteins                                |
| 105 | Mm00437136_m1 | Tnfrsf18       | tumor necrosis factor receptor superfamily, member 18        | Cytokines and<br>cytokine receptors             |
| 106 | Mm00616981_m1 | Btla           | B and T lymphocyte associated                                |                                                 |
| 107 | Mm00438864_m1 | Fasl           | forkhead box P3                                              |                                                 |
| 108 | Mm01204974_m1 | Fas            | Fas ligand (TNF superfamily, member 6)                       |                                                 |

|     |               |         |                                                      |  |
|-----|---------------|---------|------------------------------------------------------|--|
| 109 | Mm00442039_m1 | Tnfrsf4 | tumor necrosis factor receptor superfamily, member 4 |  |
| 110 | Mm00440228_gH | Lta     | lymphotoxin A                                        |  |
| 111 | Mm01342740_g1 | Socs1   | suppressor of cytokine signaling 1                   |  |
| 112 | Mm01249143_g1 | Socs3   | suppressor of cytokine signaling 3                   |  |

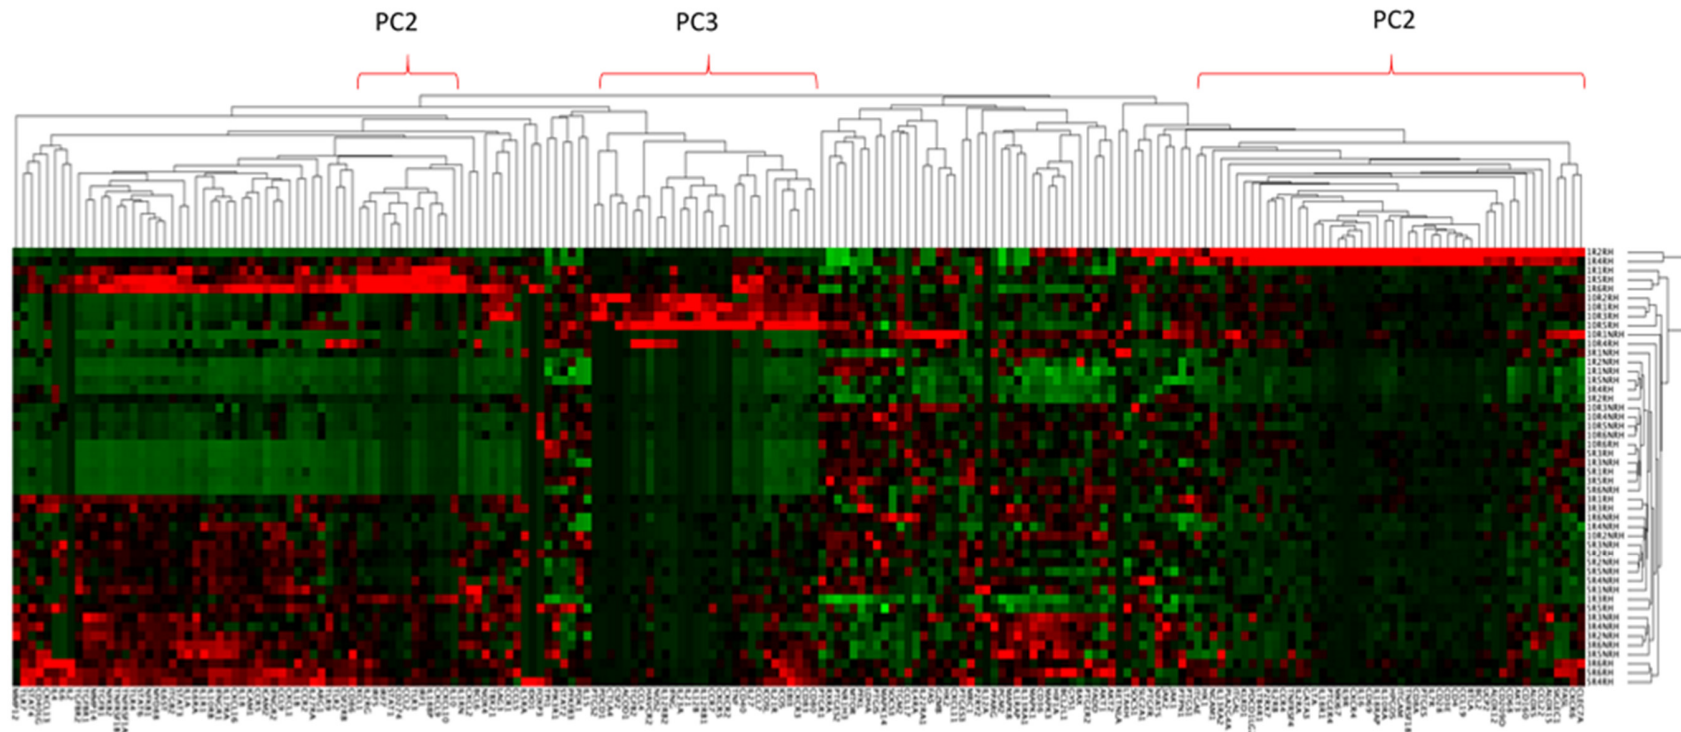

**Figure S1. Unsupervised hierarchal clustering of gene expression data.** qPCR was carried out on mice liver tissue infected and control with *L. infantum* at 1, 3, 5 and 10 dpi. Unsupervised hierarchal clustering of the complete NRQ data: samples vs genes, was applied and based on Euclidean distance and pairwise average-complete linkage. Genes downregulated during infection are shown in green and upregulated genes are in red.
